# Supplementary material for: The hydrogen atom transfer reactivity of a porphyrinoid cobalt superoxide complex
Source: Royal Society of Chemistry journal article supplement (doi:10.1039/c8cc08453j), 2019-01-01
Supplement: c8cc08453j1.pdf [file c8cc08453j1.pdf]

## Electronic Supplemental Information

The Hydrogen Atom Transfer Reactivity of a Porphyrinoid Cobalt Superoxide Complex

*Jireh Joy D. Sacramento and David P. Goldberg\**

Department of Chemistry, The Johns Hopkins University, 3400 N. Charles Street, Baltimore,  
MD 21218, USA

\*Email: [dpg@jhu.edu](mailto:dpg@jhu.edu)

**Materials.** All chemicals were purchased from commercial sources and used without further purification unless otherwise stated. Reactions involving inert atmospheres were performed under an Ar atmosphere using standard Schlenk techniques or in an N<sub>2</sub>-filled dry box. Dichloromethane and THF were purified via a Pure-Solv solvent purification system from Innovative Technologies, Inc. Anhydrous pyridine (py) was purchased from Sigma Aldrich. Deuterated solvents for NMR were purchased from Cambridge Isotopes, Inc. Dichloromethane, pyridine and deuterated solvents were distilled from CaH<sub>2</sub> then degassed by repeated cycles of freeze-pump-thaw and stored over 4 Å molecular sieves in an N<sub>2</sub>-filled drybox prior to use. The synthesis of Co<sup>III</sup>(py)<sub>2</sub>(TBP<sub>8</sub>Cz) (TBP<sub>8</sub>Cz = octakis(*p*-*tert*-butylphenyl)corrolazinato)<sup>1,2</sup> and 2,2,6,6-tetramethylpiperidine hydroxylamine (TEMPOH)<sup>3</sup> followed published literature procedures. Diphenylhydrazine (DPH) was recrystallized twice in ethanol and dried under vacuum prior to use.

**Instrumentation.** UV-vis spectra were collected with a Varian Cary 50 Bio Spectrophotometer coupled to a Unisoku USP-203 Cryostat or a Hewlett-Packard Agilent 8453 diode-array spectrophotometer with an air-free quartz cuvette (3.5 mL, path length = 1 cm) fitted with a septum. <sup>1</sup>H NMR spectra were recorded on a Bruker Advance 400 or 300 MHz FT-NMR spectrometer. Electron paramagnetic resonance (EPR) spectra were recorded with a Bruker EMX spectrometer equipped with a Bruker ER 041 X G microwave bridge and a continuous-flow liquid helium cryostat (ESR900) coupled to an Oxford Instruments TC503 temperature controller for low temperature data collection.

### Generation of [Co<sup>III</sup>(py)(O<sub>2</sub>)(TBP<sub>8</sub>Cz)]<sup>-</sup>

**a) UV-vis spectroscopy.** To a solution of Co<sup>III</sup>(py)<sub>2</sub>(TBP<sub>8</sub>Cz) (18 – 29 μM) in CH<sub>2</sub>Cl<sub>2</sub>/py (99/1, v/v) or THF/py (99/1, v/v), was added one equiv of tetrabutylammonium borohydride (Bu<sub>4</sub>NBH<sub>4</sub>). The solution was stirred for 5 min and a color change of yellow-green to green was noted. The final green color was characteristic of the reduced Co<sup>II</sup> species. An aliquot of this solution was transferred to a custom-made Schlenk cuvette and sealed. The solution was cooled to -65 °C in the cryostat, and 50 μL of an O<sub>2</sub>-saturated CH<sub>2</sub>Cl<sub>2</sub> solution was added. The reaction was monitored by UV-vis spectroscopy. The concomitant disappearance of the 612 and 764 nm peaks and the appearance of the 700 nm peak indicated the formation of the [Co<sup>III</sup>(py)(O<sub>2</sub>)(TBP<sub>8</sub>Cz)]<sup>-</sup> species.

**b) <sup>1</sup>H NMR spectroscopy.** To a solution of Co<sup>III</sup>(py)<sub>2</sub>(TBP<sub>8</sub>Cz) (1.3 mM) in CD<sub>2</sub>Cl<sub>2</sub>/py-*d*<sub>5</sub> (20/1, v/v), was added one equiv of Bu<sub>4</sub>NBH<sub>4</sub>. The solution was stirred for 5 min and a color change of yellow-green to green was noted. The final green color was characteristic of the reduced Co<sup>II</sup> species. An aliquot of this solution was transferred to an NMR tube and sealed. The solution was cooled to -65 °C in an acetone/liquid N<sub>2</sub> bath. NMR spectra of [Co<sup>II</sup>(py)(TBP<sub>8</sub>Cz)]<sup>-</sup> were collected at 25 °C and -65 °C. The appearance of paramagnetic peaks (see Fig 4b) indicated formation of [Co<sup>II</sup>(py)(TBP<sub>8</sub>Cz)]<sup>-</sup>. An amount of O<sub>2</sub> was bubbled into the solution at -65 °C to generate [Co<sup>III</sup>(py)(O<sub>2</sub>)(TBP<sub>8</sub>Cz)]<sup>-</sup>, and then sparged with Ar(g) to remove the excess O<sub>2</sub>. The NMR spectrum of [Co<sup>III</sup>(py)(O<sub>2</sub>)(TBP<sub>8</sub>Cz)]<sup>-</sup> was collected at -65 °C.

**c) EPR spectroscopy.** To a solution of Co<sup>III</sup>(py)<sub>2</sub>(TBP<sub>8</sub>Cz) (2.1 mM) in THF/py (20/1, v/v), was added one equiv of Bu<sub>4</sub>NBH<sub>4</sub>. The solution was stirred for 5 min and a color change of yellow-green to green was noted. The final green color was characteristic of the reduced Co<sup>II</sup> species. An aliquot of this solution was transferred to an EPR tube and sealed. The solution was cooled to -65 °C in an acetone/liquid N<sub>2</sub> bath, and O<sub>2</sub> was bubbled into the solution to generate

[Co<sup>III</sup>(py)(O<sub>2</sub>)(TBP<sub>8</sub>Cz)]<sup>-</sup>. The reaction mixture was then sparged with Ar<sub>(g)</sub> to remove the excess O<sub>2</sub>. The solution was rapidly frozen in liquid nitrogen prior to analysis by EPR spectroscopy. EPR parameters: T = 12 K, freq. = 9.43 GHz, power = 0.201 mW, mod. amp. = 10 G, mod. freq. = 100 kHz, receiver gain = 5.02 × 10<sup>3</sup>.

### Reactivity with N–H substrates

**a) Reaction of [Co<sup>III</sup>(py)(O<sub>2</sub>)(TBP<sub>8</sub>Cz)]<sup>-</sup> with phenylhydrazine. EPR Spectroscopy.** To a solution of [Co<sup>III</sup>(py)(O<sub>2</sub>)(TBP<sub>8</sub>Cz)]<sup>-</sup> (2.1 mM) in CH<sub>2</sub>Cl<sub>2</sub>/py (20/1, v/v) at -65 °C, was added a solution of phenylhydrazine in CH<sub>2</sub>Cl<sub>2</sub> (50 μL, 5.3 mmol, 50 equiv). The reaction mixture was allowed to react for 1 min and then frozen in liquid N<sub>2</sub> prior to analysis by EPR spectroscopy. EPR parameters: T = 12 K, freq. = 9.43 GHz, power = 0.201 mW, mod. amp. = 10 G, mod. freq. = 100 kHz, receiver gain = 5.02 × 10<sup>3</sup>.

**b) Reaction of [Co<sup>III</sup>(py)(O<sub>2</sub>)(TBP<sub>8</sub>Cz)]<sup>-</sup> with DPH. <sup>1</sup>H NMR Spectroscopy.** To two separate solutions of [Co<sup>III</sup>(py)(O<sub>2</sub>)(TBP<sub>8</sub>Cz)]<sup>-</sup> (1.3 mM, 500 μL) in CD<sub>2</sub>Cl<sub>2</sub>/py-*d*<sub>5</sub> (20/1, v/v) at -65 °C was added a solution of DPH in CD<sub>2</sub>Cl<sub>2</sub>: (a) 50 μL, 0.35 μmol, 1 equiv and (b) 100 μL, 0.70 μmol, 2 equiv. The reaction mixtures were allowed to react at low temperature for 1 h, after which time, an internal standard, 3,5-dimethylanisole (DMA) (3.33 μmol) was added to each solution and the <sup>1</sup>H NMR spectra were recorded at -65 °C. The peaks corresponding to the phenyl protons of the *p-tBu*-phenyl groups of Co<sup>III</sup>(py)<sub>2</sub>(TBP<sub>8</sub>Cz) at 8.21 (d, 4H) and the phenyl protons of azobenzene at 7.99 ppm (d, 4H) were integrated versus the phenyl proton of DMA at 6.63 ppm (s, 1H). Two trials were performed. Average yields of two trials for Co<sup>III</sup>(py)<sub>2</sub>(TBP<sub>8</sub>Cz) and azobenzene were 87% ± 12% and 93% ± 12% respectively, assuming a stoichiometry of 2:1 (Co<sup>III</sup>(py)<sub>2</sub>(TBP<sub>8</sub>Cz) : azobenzene). A control reaction was prepared by mixing Bu<sub>4</sub>NBH<sub>4</sub> (1.3 mM) with DPH (2 equiv) and excess O<sub>2</sub> in the absence of the cobalt complex. The excess O<sub>2</sub> was removed by sparging with Ar<sub>(g)</sub> at -65 °C, and DMA (3.33 μmol) was added as internal standard. The NMR spectrum was recorded and showed only peaks of the starting material diphenylhydrazine.

**c) Kinetics of the reaction of [Co<sup>III</sup>(py)(O<sub>2</sub>)(TBP<sub>8</sub>Cz)]<sup>-</sup> with DPH (<sup>1</sup>H/<sup>2</sup>D) as monitored by UV-vis.** An amount of DPH (~10 – 100 equiv) was added to a solution of [Co<sup>III</sup>(py)(O<sub>2</sub>)(TBP<sub>8</sub>Cz)]<sup>-</sup> (18 μM for DPH and 29 μM for DPH-*d*<sub>2</sub>) in CH<sub>2</sub>Cl<sub>2</sub>/py (99/1, v/v). The reaction was monitored by UV-vis spectroscopy and showed the decay of [Co<sup>III</sup>(py)(O<sub>2</sub>)(TBP<sub>8</sub>Cz)]<sup>-</sup> (λ = 700 nm) and production of Co<sup>III</sup>(py)<sub>2</sub>(TBP<sub>8</sub>Cz) (λ = 670 nm). The pseudo-first-order rate constants, *k*<sub>obs</sub>, were obtained by nonlinear least-squares fitting of the growth of Co<sup>III</sup>(py)<sub>2</sub>(TBP<sub>8</sub>Cz) (670 nm) and decay of [Co<sup>III</sup>(py)(O<sub>2</sub>)(TBP<sub>8</sub>Cz)]<sup>-</sup> (λ = 700 nm) plotted as absorbance (Abs) versus time (t). The data were fit to the equation Abs<sub>t</sub> = Abs<sub>f</sub> + (Abs<sub>0</sub> - Abs<sub>f</sub>)exp(-*k*<sub>obs</sub>*t*), where Abs<sub>0</sub> and Abs<sub>f</sub> are initial and final absorbance, respectively. Pseudo-first order *k*<sub>obs</sub> values were obtained and exhibited a linear correlation with substrate concentrations. Second-order rate constants (*k*<sub>2</sub>) were obtained from the slope of the best-fit line from a plot of *k*<sub>obs</sub> versus substrate concentration. Kinetics of reaction of [Co<sup>III</sup>(py)(O<sub>2</sub>)(TBP<sub>8</sub>Cz)]<sup>-</sup> with DPH at two other temperatures (-75 °C and -85 °C) were also monitored.

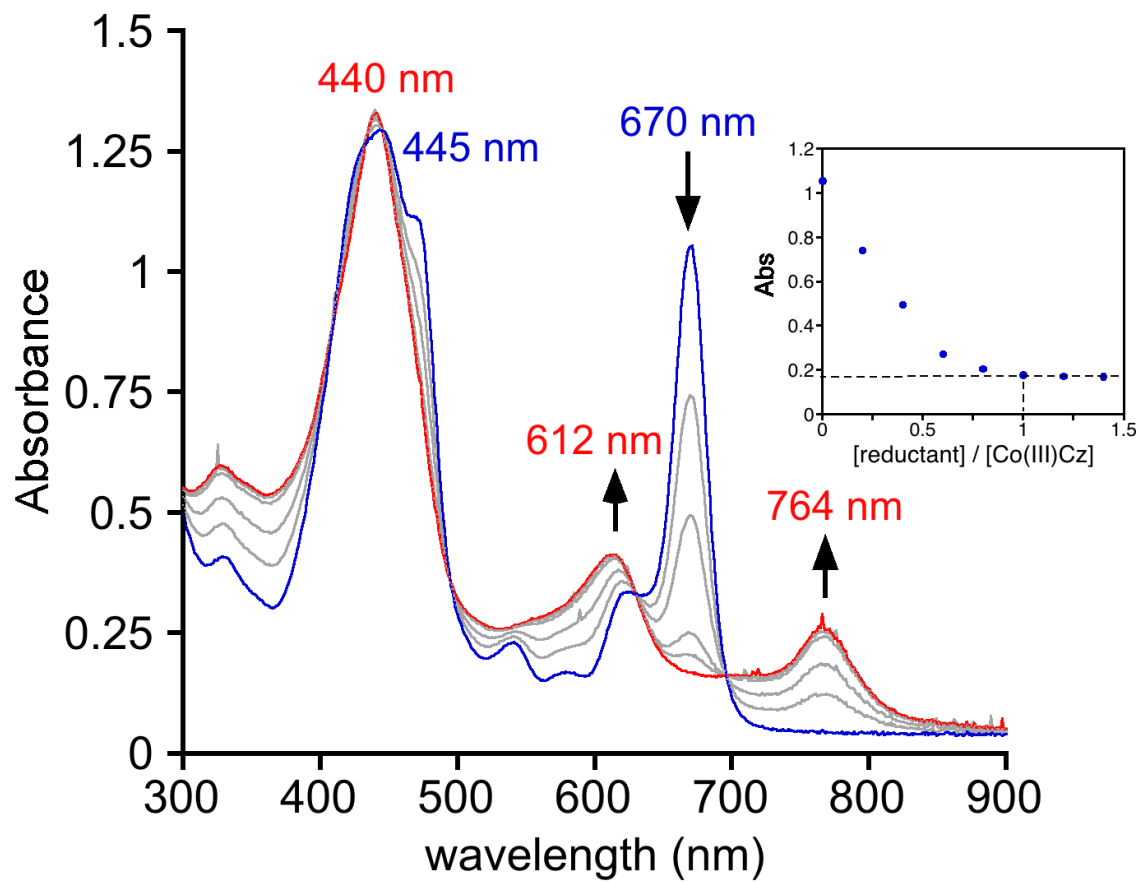

**Figure S1.** UV-vis spectral titration of  $\text{Co}^{\text{III}}(\text{py})_2(\text{TBP}_8\text{Cz})$  (29  $\mu\text{M}$ ) with  $\text{Bu}_4\text{NBH}_4$  (0 – 1 equiv) in  $\text{CH}_2\text{Cl}_2/\text{py}$  (99/1, v/v) at 25  $^\circ\text{C}$ .

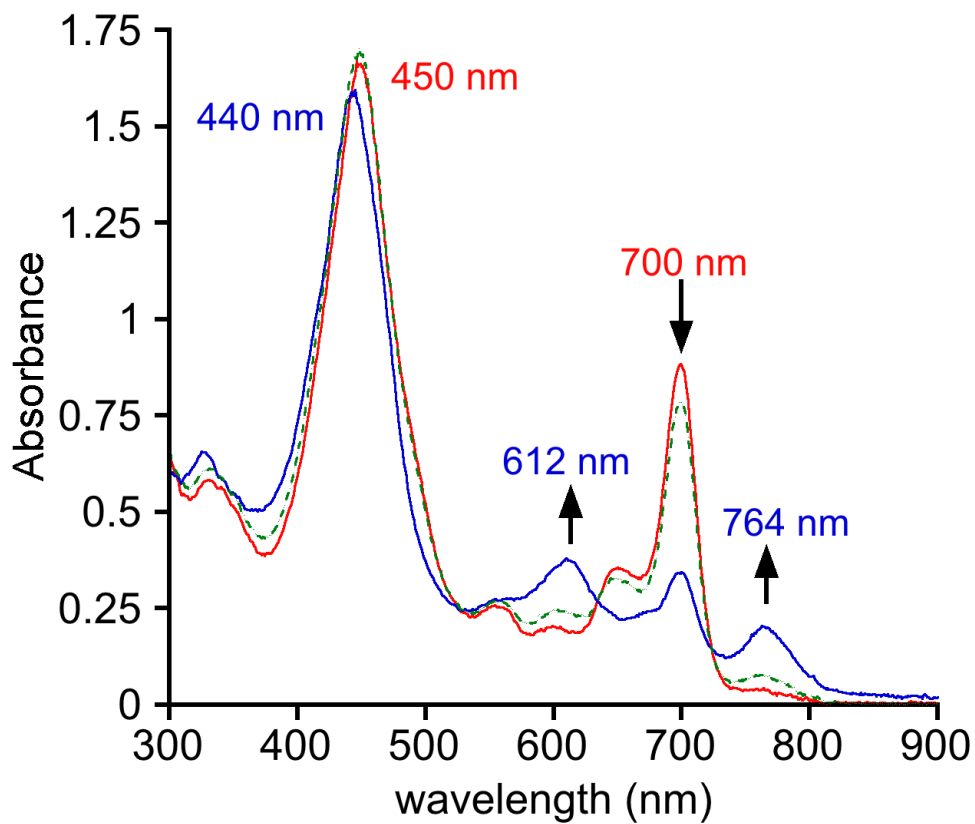

**Figure S2.** UV-vis spectra of  $[\text{Co}^{\text{III}}(\text{py})(\text{O}_2)(\text{TBP}_8\text{Cz})]^-$  ( $29 \mu\text{M}$ ) (red) after sparging with  $\text{Ar}_{(\text{g})}$  (20 min) in  $\text{CH}_2\text{Cl}_2/\text{py}$  (99/1, v/v) at  $-65 \text{ }^\circ\text{C}$  (blue), and after regeneration by sparging with  $\text{O}_{2(\text{g})}$  (green).

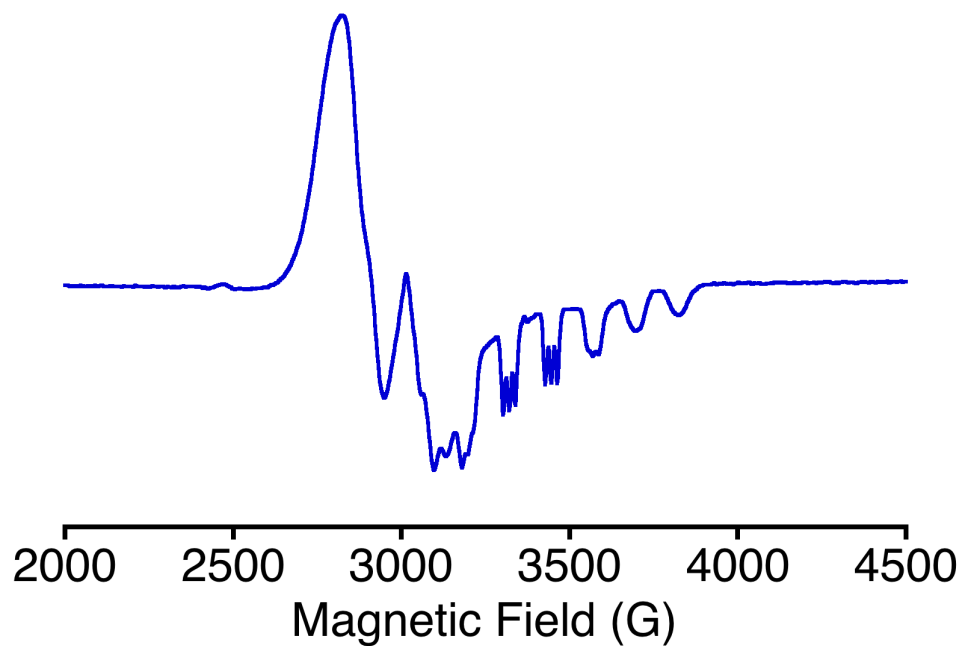

**Figure S3.** EPR spectrum of  $[\text{Co}^{\text{II}}(\text{py})(\text{TBP}_8\text{Cz})]^-$  (2.1 mM) in THF/py (20/1, v/v). EPR parameters:  $T = 12$  K, freq. = 9.43 GHz, power = 0.201 mW, mod. amp. = 10 G, mod. freq. = 100 kHz, receiver gain =  $5.02 \times 10^3$ .

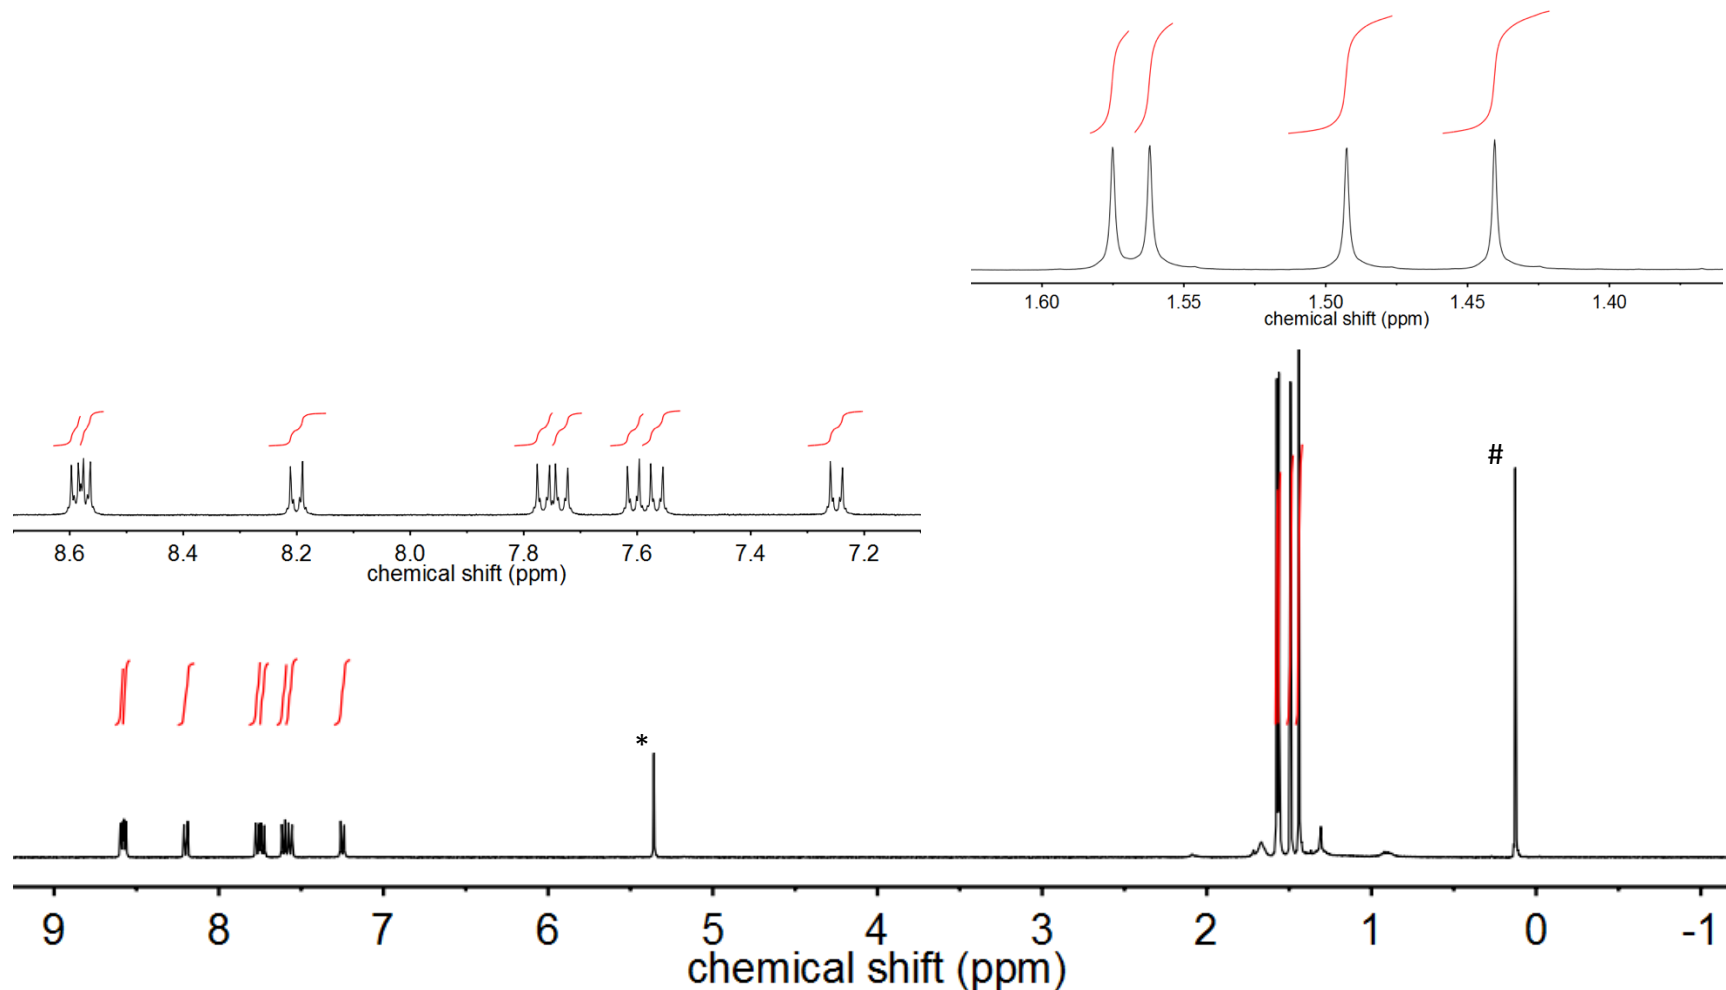

**Figure S4a.** <sup>1</sup>H NMR spectrum of Co<sup>III</sup>(py)<sub>2</sub>(TBP<sub>8</sub>Cz) (1.3 mM) at 25 °C in CD<sub>2</sub>Cl<sub>2</sub>/py-d<sub>5</sub> (20/1, v/v). \* = CH<sub>2</sub>Cl<sub>2</sub>, # = grease. <sup>1</sup>H NMR (400 MHz, CD<sub>2</sub>Cl<sub>2</sub>:py-d<sub>5</sub> (20:1, v/v)): δ (ppm) 8.59 (d, *J* = 8 Hz, 4H), 8.57 (d, *J* = 8 Hz, 4H), 8.21 (d, *J* = 8 Hz, 4H), 7.77 (d, *J* = 8 Hz, 4H), 7.73 (d, *J* = 8 Hz, 4H) 7.61 (d, *J* = 8 Hz, 4H), 7.57 (d, *J* = 8 Hz, 4H), 7.25 (d, *J* = 8 Hz, 4H), 1.58 (s, 18H), 1.56 (s, 18H), 1.49 (s, 18H), 1.44 (s, 18H).

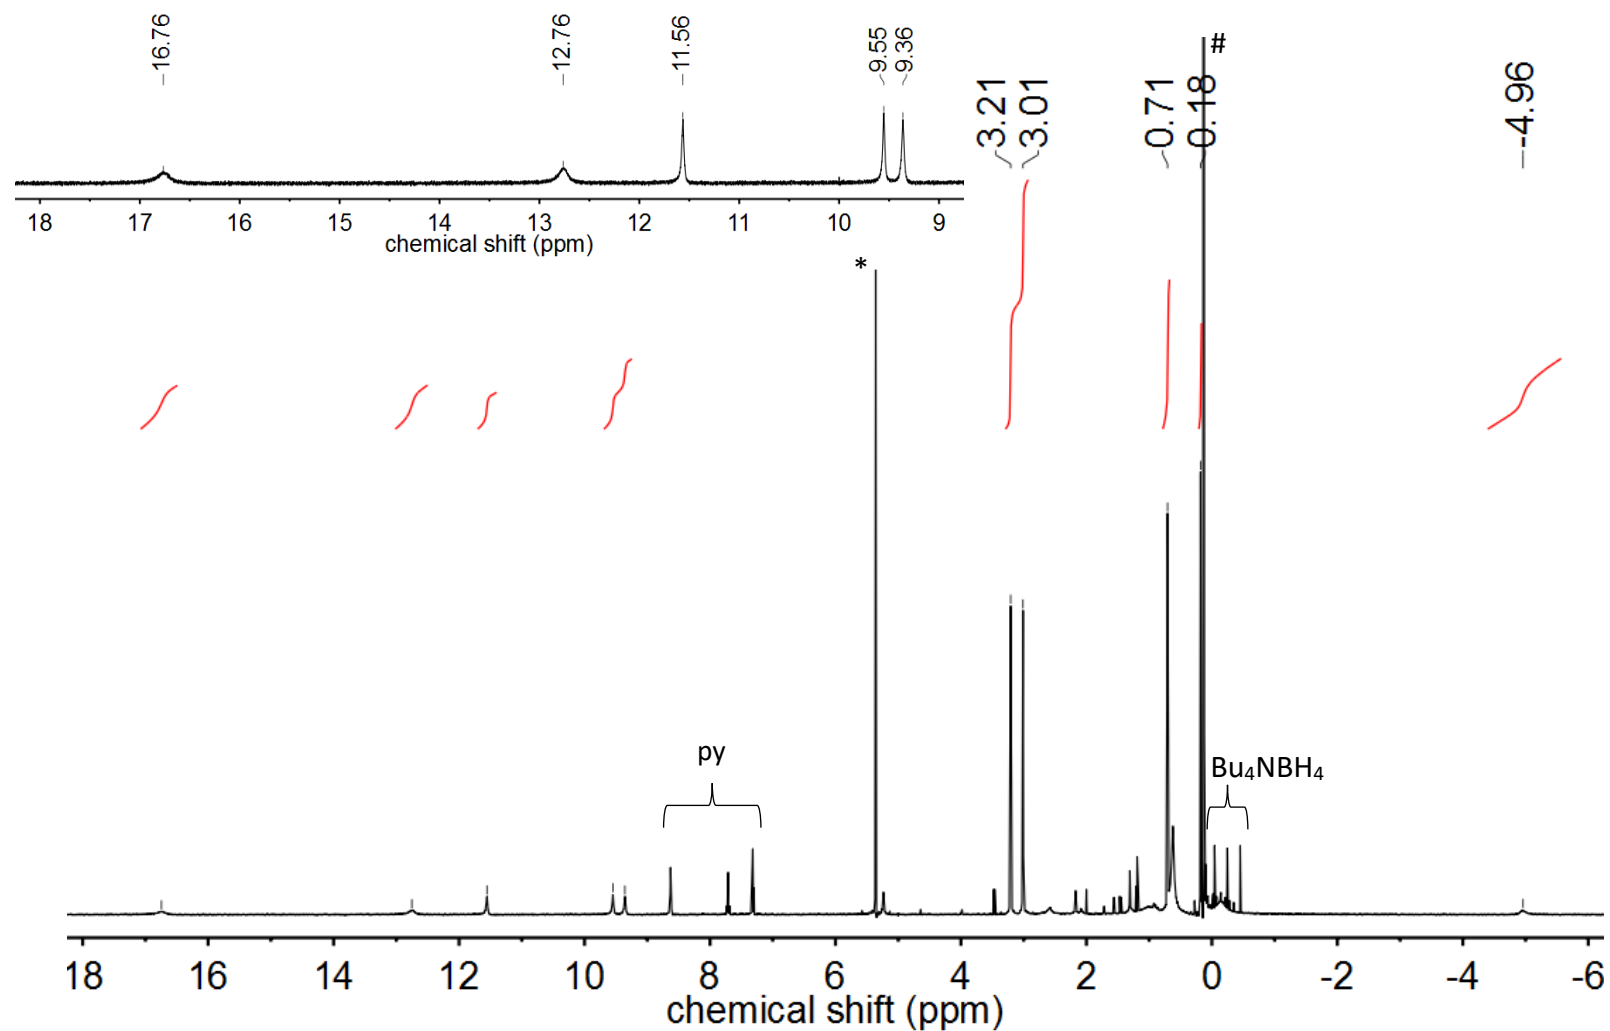

**Figure S4b.** <sup>1</sup>H NMR spectrum of [Co<sup>II</sup>(py)(TBP<sub>8</sub>Cz)]<sup>-</sup> (1.3 mM) at 25 °C in CD<sub>2</sub>Cl<sub>2</sub>/py-*d*<sub>5</sub> (20/1, v/v). \* = CH<sub>2</sub>Cl<sub>2</sub>, # = grease. <sup>1</sup>H NMR (400 MHz, CD<sub>2</sub>Cl<sub>2</sub>:py-*d*<sub>5</sub> (20:1, v:v)): δ (ppm) 16.76, 12.76, 11.56, 9.56, 9.36, 3.21, 3.01, 0.71, 0.18, -4.96.



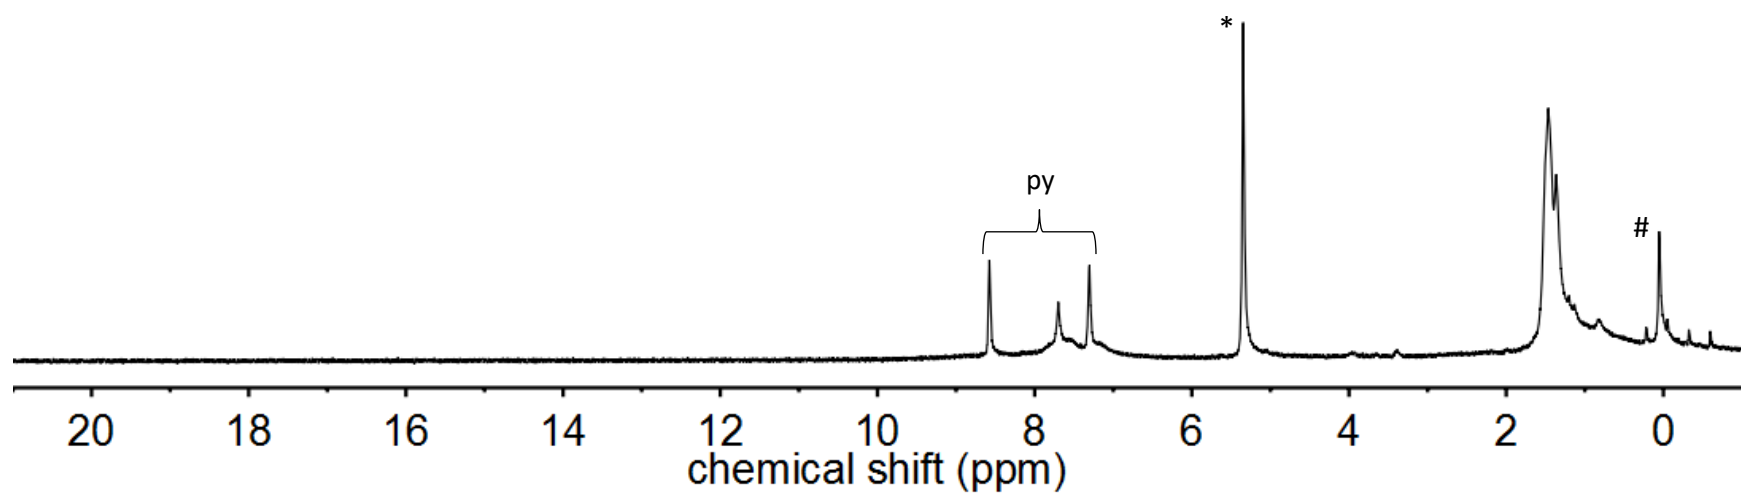

**Figure S4c.** <sup>1</sup>H NMR spectrum of [Co<sup>III</sup>(py)(O<sub>2</sub>)(TBP<sub>8</sub>Cz)]<sup>-</sup> (1.3 mM) at -65 °C in CD<sub>2</sub>Cl<sub>2</sub>/py-*d*<sub>5</sub> (20/1, v/v). \* = CH<sub>2</sub>Cl<sub>2</sub>, # = grease.

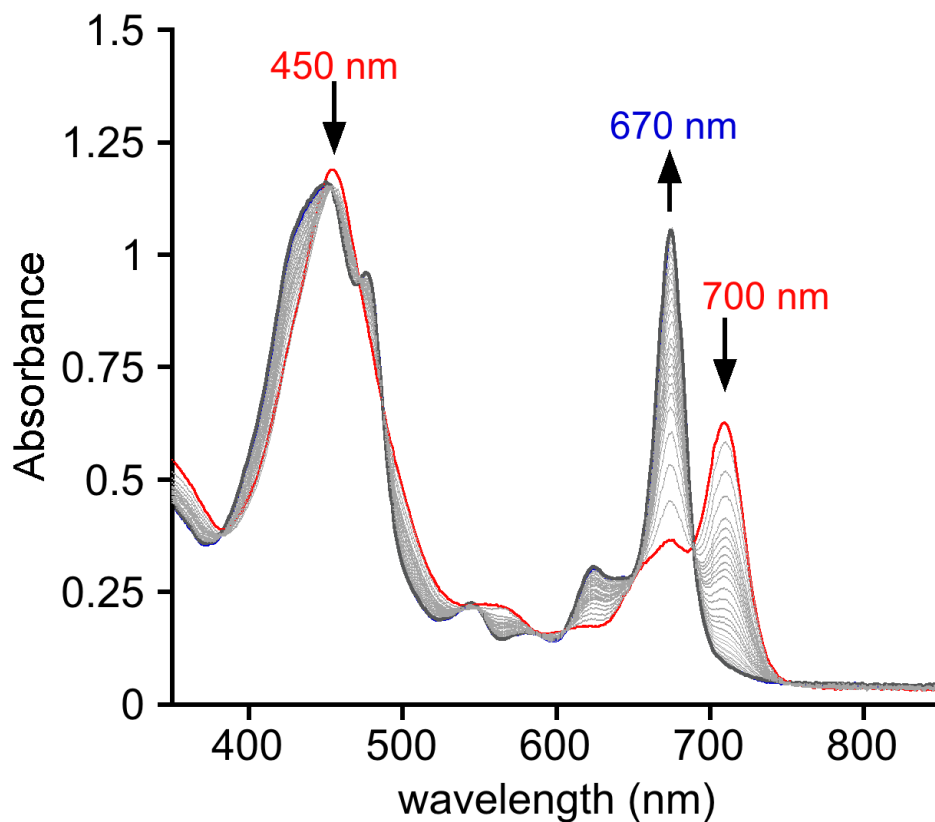

**Figure S5.** Time-resolved UV-vis spectral changes (0 – 70 min) observed for the reaction of  $[\text{Co}^{\text{III}}(\text{py})(\text{O}_2)(\text{TBP}_8\text{Cz})]^-$  (18  $\mu\text{M}$ ) with TEMPOH (1573 equiv) to form  $\text{Co}^{\text{III}}(\text{py})_2(\text{TBP}_8\text{Cz})$  in  $\text{CH}_2\text{Cl}_2/\text{py}$  (99/1, v/v) at  $-65\text{ }^\circ\text{C}$

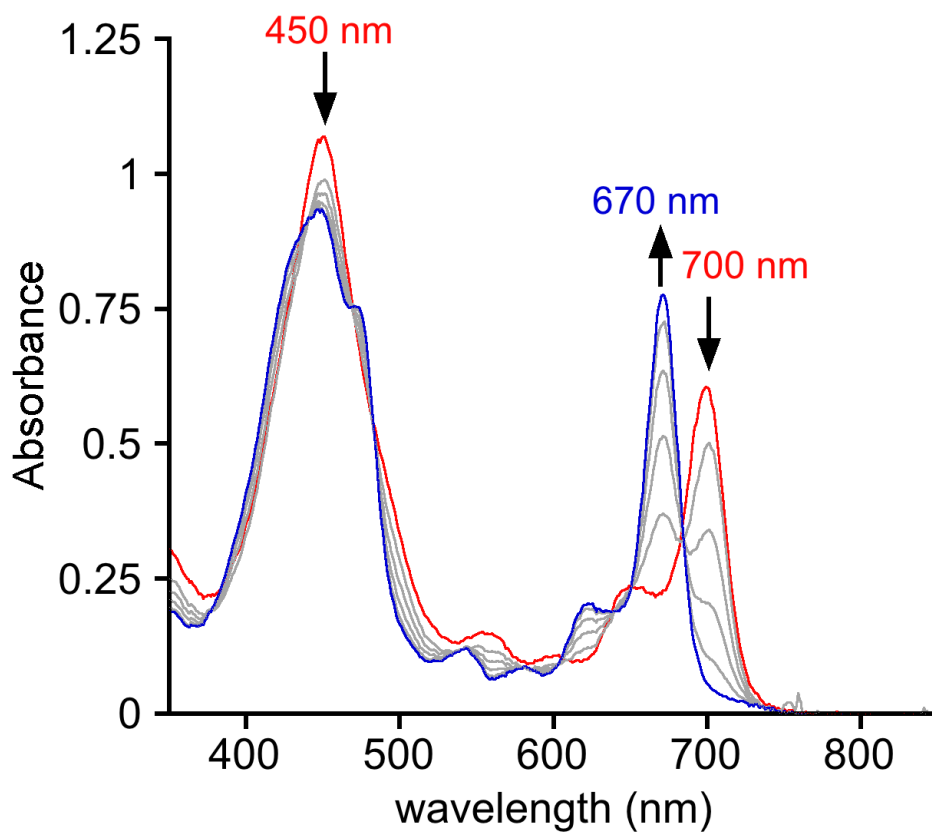

**Figure S6.** Time-resolved UV-vis spectral changes (0 – 5 min) observed for the reaction of  $[\text{Co}^{\text{III}}(\text{py})(\text{O}_2)(\text{TBP}_8\text{Cz})]^-$  (18  $\mu\text{M}$ ) with  $\text{PhNHNH}_2$  (222 equiv) to form  $\text{Co}^{\text{III}}(\text{py})_2(\text{TBP}_8\text{Cz})$  in  $\text{CH}_2\text{Cl}_2/\text{py}$  (99/1, v/v) at  $-65^\circ\text{C}$ .

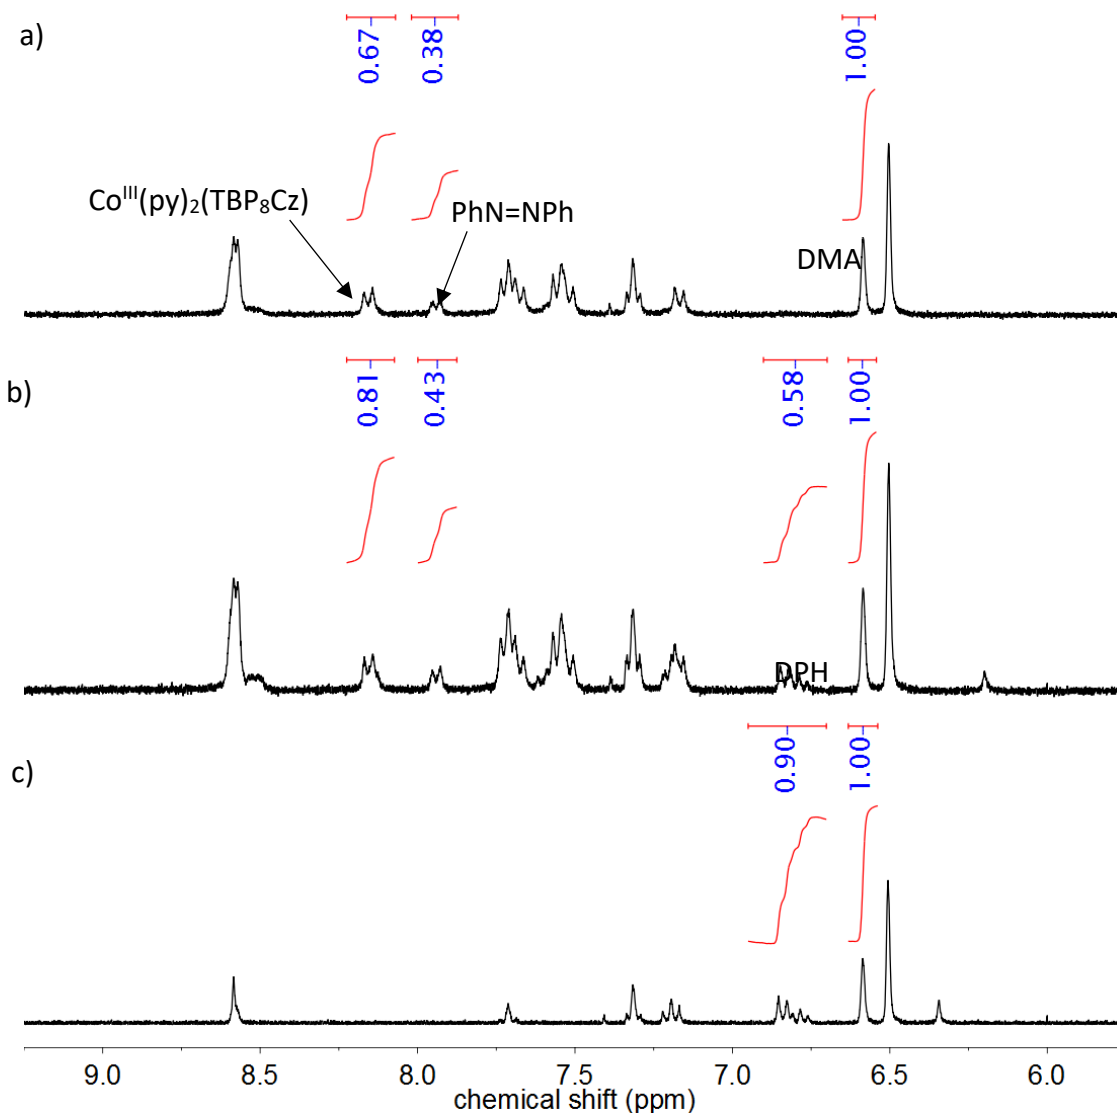

**Figure S7.**  $^1\text{H}$  NMR spectra for the reaction of  $[\text{Co}^{\text{III}}(\text{py})(\text{O}_2)(\text{TBP}_8\text{Cz})]^-$  (1.3 mM) with a) 1 equiv and b) 2 equiv of DPH in  $\text{CD}_2\text{Cl}_2/\text{py}$  (20/1, v/v) to form  $\text{Co}^{\text{III}}(\text{py})_2(\text{TBP}_8\text{Cz})$  and azobenzene ( $\text{PhN}=\text{NPh}$ ). The peaks corresponding to the phenyl protons of the *p*-*t*Bu-phenyl groups of  $\text{Co}^{\text{III}}(\text{py})_2(\text{TBP}_8\text{Cz})$  at 8.21 (d, 4H) and the phenyl protons of azobenzene at 7.99 ppm (d, 4H) were integrated versus the phenyl proton of DMA at 6.63 ppm (s, 1H). Two trials were performed. Average yields of two trials for  $\text{Co}^{\text{III}}(\text{py})_2(\text{TBP}_8\text{Cz})$  and azobenzene were  $87\% \pm 12\%$  and  $93\% \pm 12\%$  respectively, assuming a stoichiometry of 2:1 ( $\text{Co}^{\text{III}}(\text{py})_2(\text{TBP}_8\text{Cz})$  : azobenzene), as computed using the formula below. For a separate control reaction (c), the NMR spectrum showed only peaks of the starting material diphenylhydrazine.

$$\% \text{ yield } \text{Co}^{\text{III}}(\text{py})_2(\text{TBP}_8\text{Cz}) = \frac{n_{\text{DMA}} \times \frac{I_{\text{Co}^{\text{III}}\text{Cz}} \times \frac{1}{4}}{I_{\text{DMA}}}}{n_{\text{Co}^{\text{III}}\text{Cz}_{\text{initial}}}} \times 100\%$$

$$\% \text{ yield azobenzene} = \frac{n_{\text{DMA}} \times \frac{I_{\text{azo}} \times \frac{1}{4} \times 2}{I_{\text{DMA}}}}{n_{\text{Co}^{\text{III}}\text{Cz}_{\text{initial}}}} \times 100\%$$

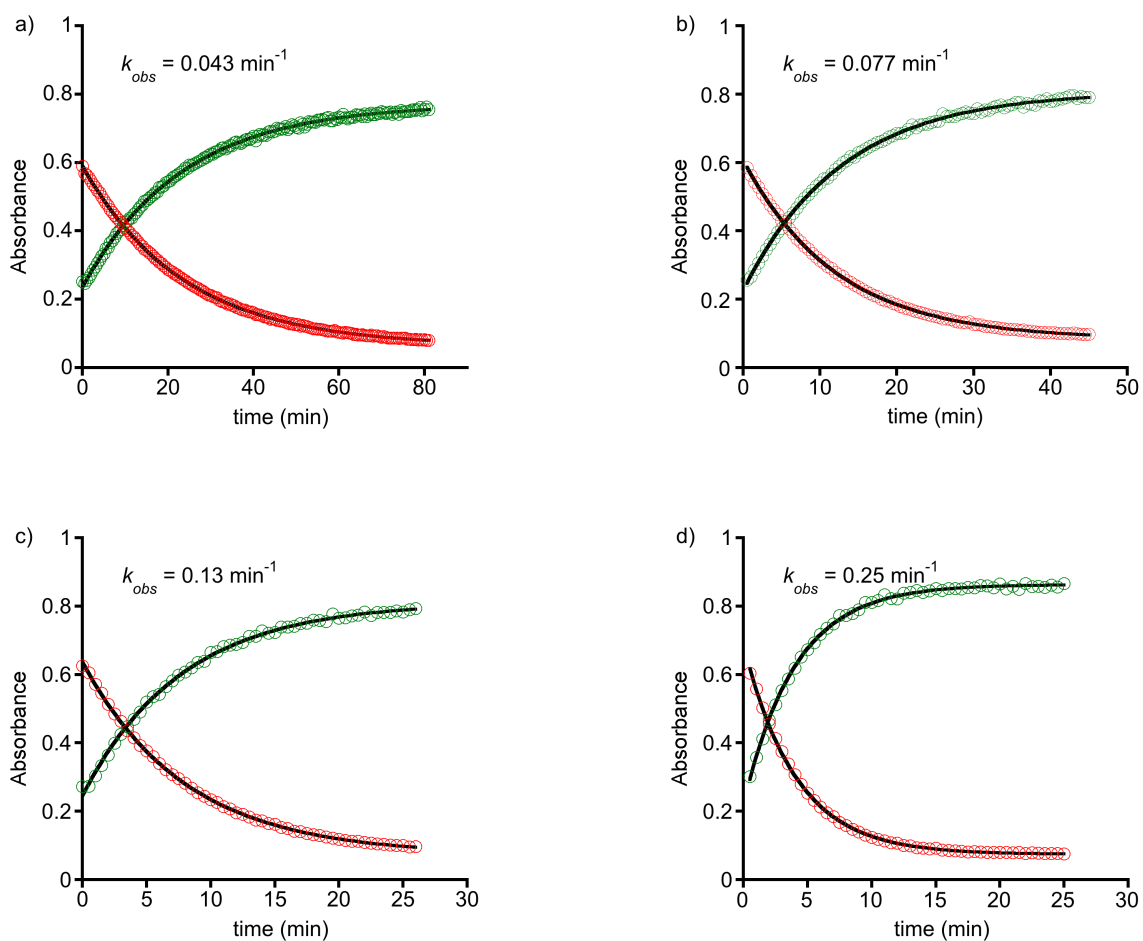

**Figure S8.** Plots of the change in absorbance vs time for the growth of  $\text{Co}^{\text{III}}(\text{py})_2(\text{TBP}_8\text{Cz})$  (670 nm) (green) and decay of  $[\text{Co}^{\text{III}}(\text{py})(\text{O}_2)(\text{TBP}_8\text{Cz})]^-$  (700 nm) (red) with the best fit lines for the reaction of  $[\text{Co}^{\text{III}}(\text{py})(\text{O}_2)(\text{TBP}_8\text{Cz})]^-$  (18  $\mu\text{M}$ ) with DPH (a-d: 8, 18, 30, 61 equiv) in  $\text{CH}_2\text{Cl}_2/\text{py}$  (99/1, v/v) at  $-65^\circ\text{C}$ .

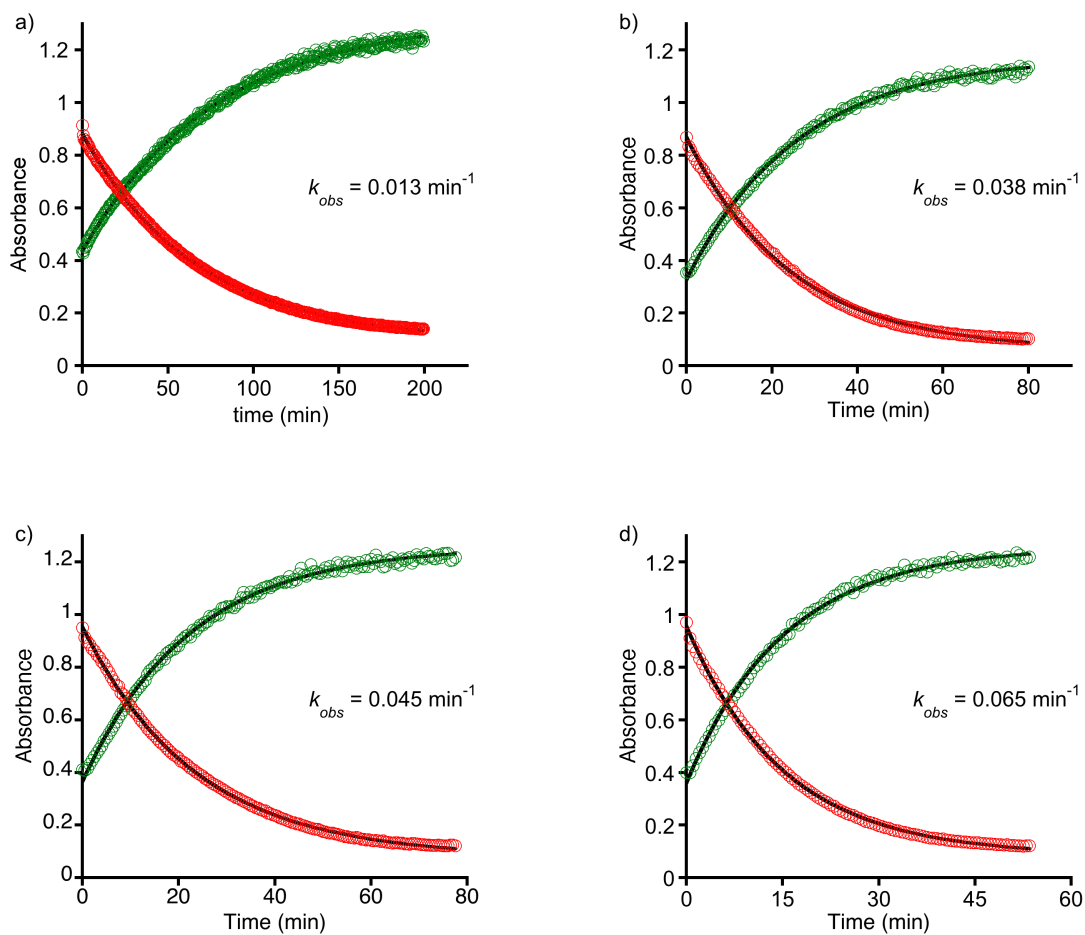

**Figure S9.** Plots of the change in absorbance vs time for the growth of  $\text{Co}^{\text{III}}(\text{py})_2(\text{TBP}_8\text{Cz})$  (670 nm) (green) and decay of  $[\text{Co}^{\text{III}}(\text{py})(\text{O}_2)(\text{TBP}_8\text{Cz})]^-$  (700 nm) (red) with the best fit lines for the reaction of  $[\text{Co}^{\text{III}}(\text{py})(\text{O}_2)(\text{TBP}_8\text{Cz})]^-$  (29  $\mu\text{M}$ ) with DPH- $d_2$  (a-d: 19, 48, 69, 93 equiv) in  $\text{CH}_2\text{Cl}_2/\text{py}$  (99/1, v/v) at  $-65^\circ\text{C}$ .

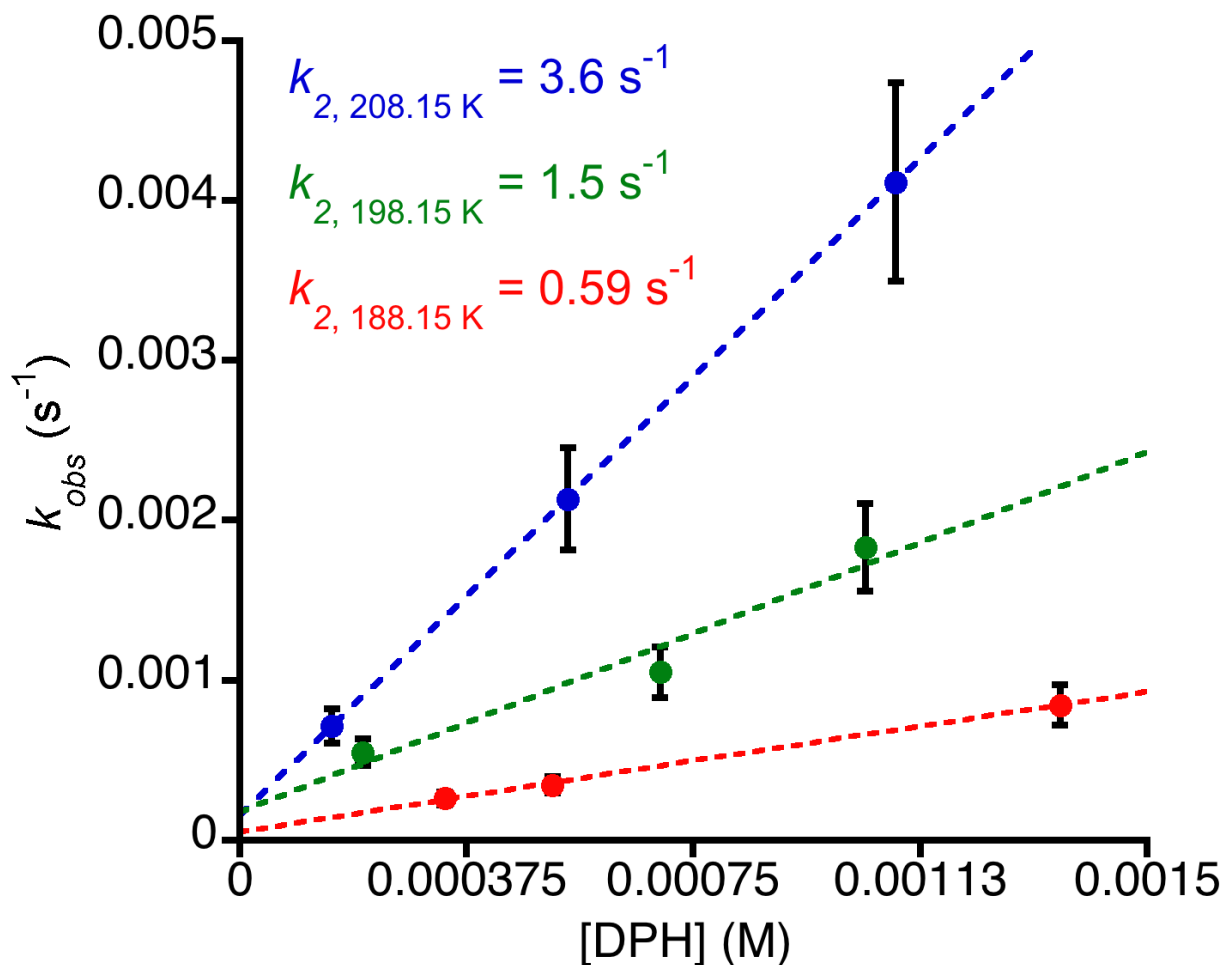

**Figure S10.** Plots of pseudo-first-order rate constants ( $k_{obs}$ ) versus [DPH] with best fit lines at -65 °C (blue), -75 °C (green), -85 °C (red).

1. E. E. Joslin, J. P. Zaragoza, R. A. Baglia, M. A. Siegler and D. P. Goldberg, *Inorg. Chem.*, 2016, **55**, 8646-8660.
2. B. Ramdhanie, L. N. Zakharov, A. L. Rheingold and D. P. Goldberg, *Inorg. Chem.*, 2002, **41**, 4105-4107.
3. S. Marque, H. Fischer, E. Baier and A. Studer, *J. Org. Chem.*, 2001, **66**, 1146-1156.
